# Supplementary material for: Local-Scale Inversion of Agricultural Ammonia Emissions: A Case Study on Schiermonnikoog, the Netherlands
Source: Copernicus journal article supplement (doi:10.5194/egusphere-2025-2826), 2025-07-15
Supplement: Supplementary file 1 [file egusphere-2025-2826-supplement.pdf]

# Supplement: Local-Scale Inversion of Agricultural Ammonia Emissions: A Case Study on Schiermonnikoog, the Netherlands

Simeng Li<sup>1</sup>, Enrico Dammers<sup>1,2</sup>, Arjo Segers<sup>2</sup>, and Jan Willem Erisman<sup>1</sup>

<sup>1</sup>Institute of Environmental Sciences, Universiteit Leiden, Leiden, the Netherlands

<sup>2</sup>Air Quality and Emissions Research, Netherlands Organisation for Applied Scientific Research (TNO), Utrecht, 3584 CB, The Netherlands

**Table S1.** Agricultural emission, sector id 6

|                                                                  |                 |                    |
|------------------------------------------------------------------|-----------------|--------------------|
| Enteric fermentation                                             | Cattle          |                    |
|                                                                  | Sheep           |                    |
|                                                                  | Swine           |                    |
|                                                                  | Other animals   |                    |
| Manure management                                                | Cattle          | dairy<br>non-dairy |
|                                                                  | Sheep           |                    |
|                                                                  | Swine           |                    |
|                                                                  | Buffalo         |                    |
|                                                                  | Goats           |                    |
|                                                                  | Horses          |                    |
|                                                                  | Mules and asses |                    |
|                                                                  | Poultry         |                    |
|                                                                  | Broilers        |                    |
|                                                                  | Turkeys         |                    |
|                                                                  | Other poultry   |                    |
|                                                                  | Other animals   |                    |
| Inorganic N-fertilizers (includes also urea application)         |                 |                    |
| Animal manure applied to soils                                   |                 |                    |
| Sewage sludge applied to soils                                   |                 |                    |
| Other organic fertilisers applied to soils (including compost)   |                 |                    |
| Urine and dung deposited by grazing animals                      |                 |                    |
| Crop residues applied to soils                                   |                 |                    |
| Farm-level agricultural operations including storage, handling a |                 |                    |
| Off-farm storage, handling and transport of bulk agricultural pr |                 |                    |
| Cultivated crops                                                 |                 |                    |
| Use of pesticides                                                |                 |                    |
| Rice cultivation                                                 |                 |                    |
| Field burning of agricultural residues                           |                 |                    |
| Urea application                                                 |                 |                    |
| Other                                                            |                 |                    |

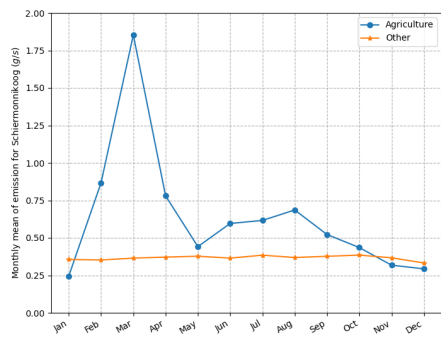

(a) Emission in 2019

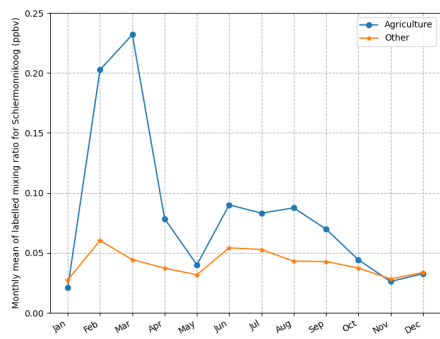

(b) Concentration in 2019

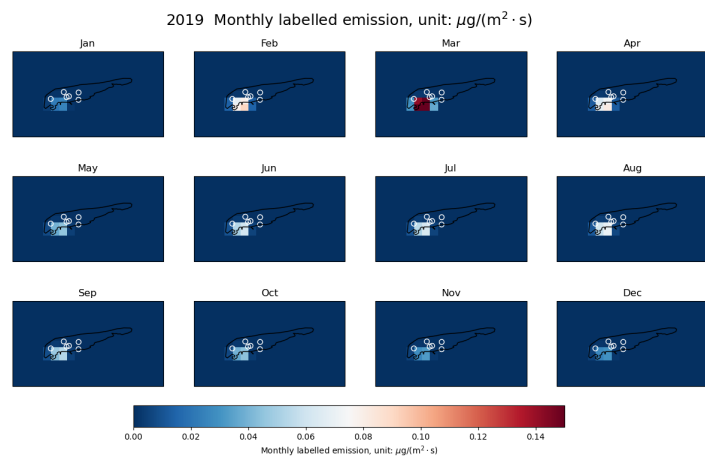

(c) Schier\_agri Emission in 2019

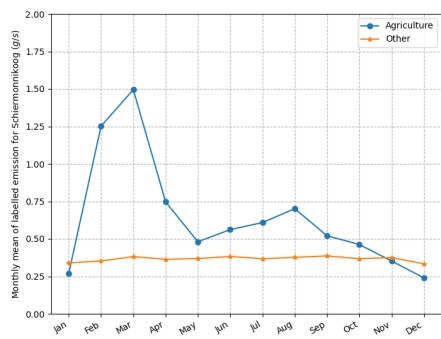

(d) Emission in 2022

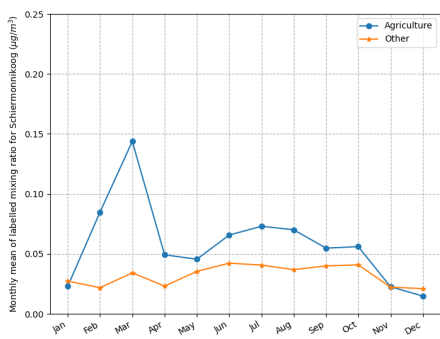

(e) Concentration in 2022

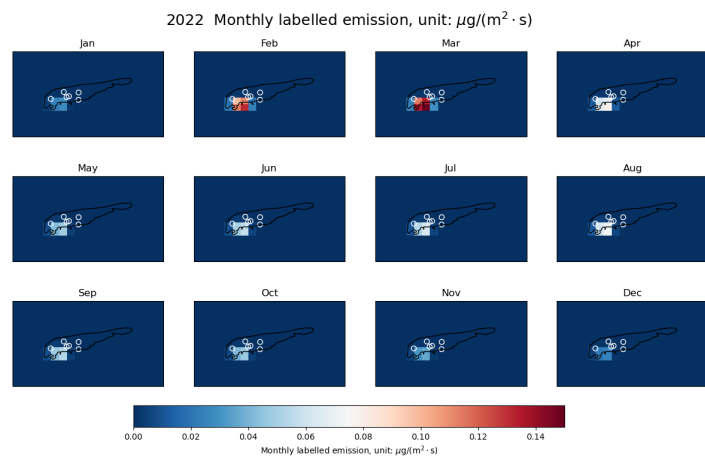

(f) Schier\_agri Emission in 2022

**Figure S1.** The monthly time profile for prior emissions and their contribution to local ammonia concentration on Schiermonnikoog in 2019 and 2022.

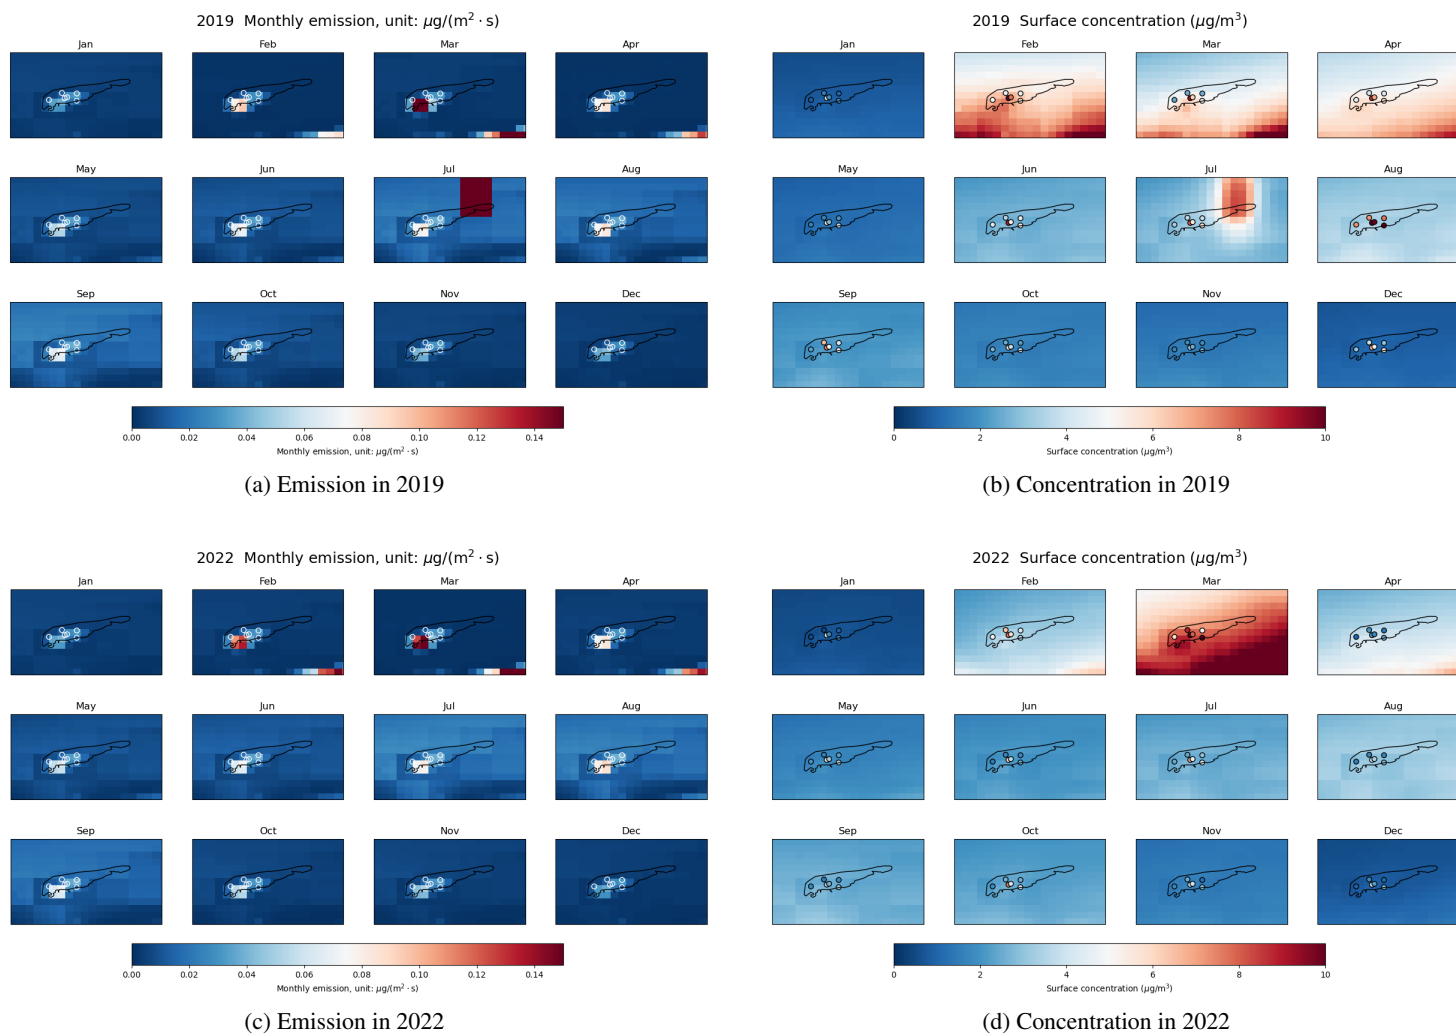

**Figure S2.** The monthly time profile for prior emissions and their contribution to local ammonia concentration on Schiermonnikoog in 2019 and 2022.

If we increase the measurements at the same sites, and then average those into one "superobservation" for that site, the total error could be reduced significantly and might be comparable to relatively high-quality measurement data. Assuming we have 6 sets of available MAN data at the very same site, then the total error should be, derived from Noordijk et al. (2020) Sect. 3.3:

$$s_{0\text{ tot}} = \left( \frac{s_{0\text{ MAN measurement}}^2 + s_{0\text{ cal method}}^2}{6} \right)^{\frac{1}{2}} \approx 0.36 \mu\text{g}/\text{m}^3 \quad (1)$$

$$\text{RSD}_{\text{tot}} = \left[ \text{RSD}_{\text{MAN measurement}}^2 + \frac{\text{RSD}_{\text{cal method}}^2 + \text{RSD}_{\text{cal standard}}^2}{6} \right]^{\frac{1}{2}} \approx 10\% \quad (2)$$

While enhancing a single MAN site alone does not achieve the same performance as adding a single LML-like site (see Fig. S3a), substituting all six MAN sites on Schiermonnikoog with corresponding superobservations yields substantial improvements (Fig. S3b). In fact, this approach performs even better than the LML-like configuration in March and April. More details are provided in the Supplement.

## References

Noordijk, H., Braam, M., Rutledge-Jonker, S., Hoogerbrugge, R., Stolk, A., and van Pul, W.: Performance of the MAN ammonia monitoring network in the Netherlands, *Atmospheric Environment*, 228, 117 400, <https://doi.org/https://doi.org/10.1016/j.atmosenv.2020.117400>, 2020.

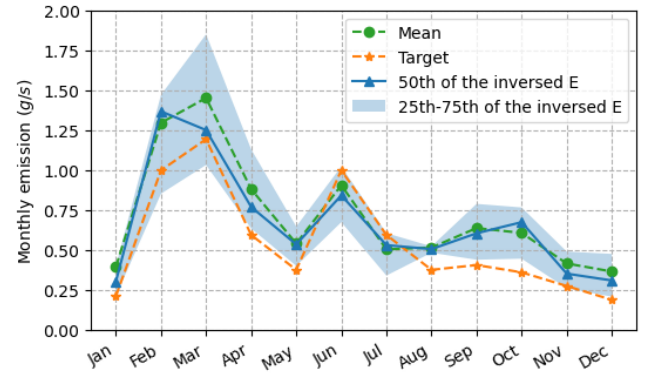

(a) One superobservation at Schiermonnikoog-Kooiduinen

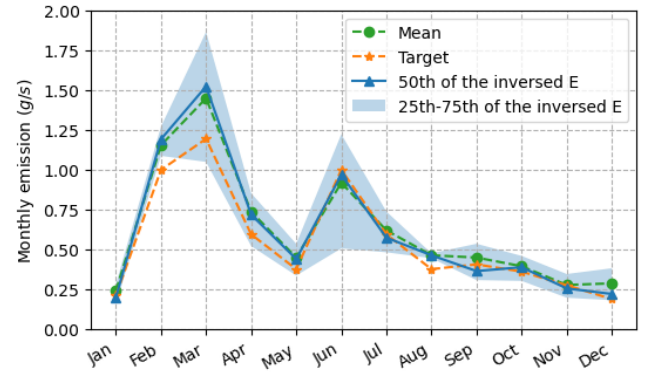

(b) Substitute all the 6 sites with superobservations

**Figure S3.** Posterior emission of the inversion with superobservations

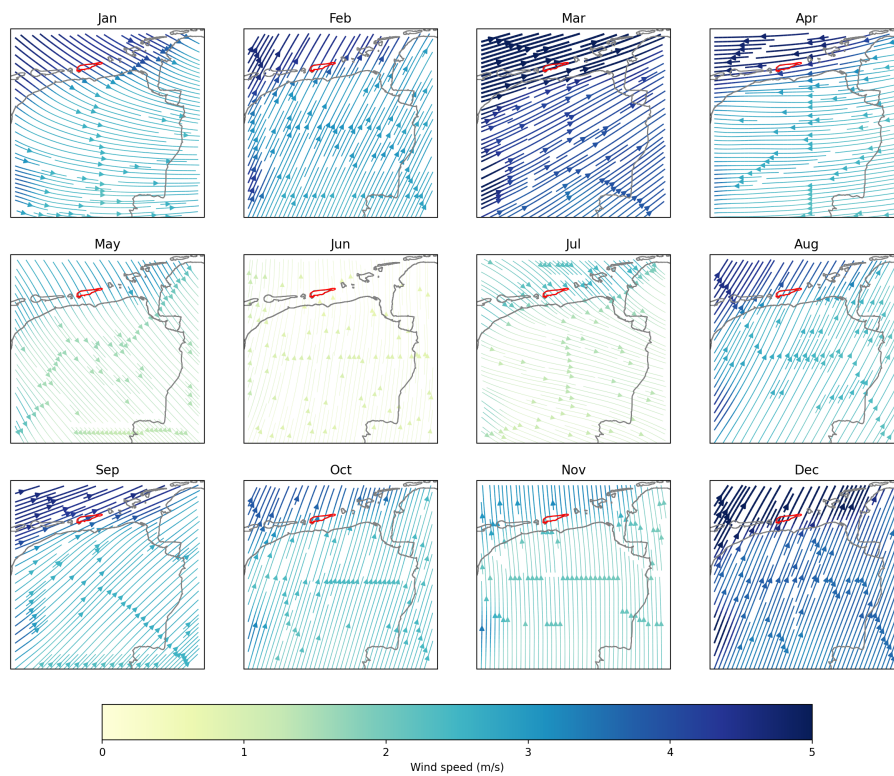

(a) 2019

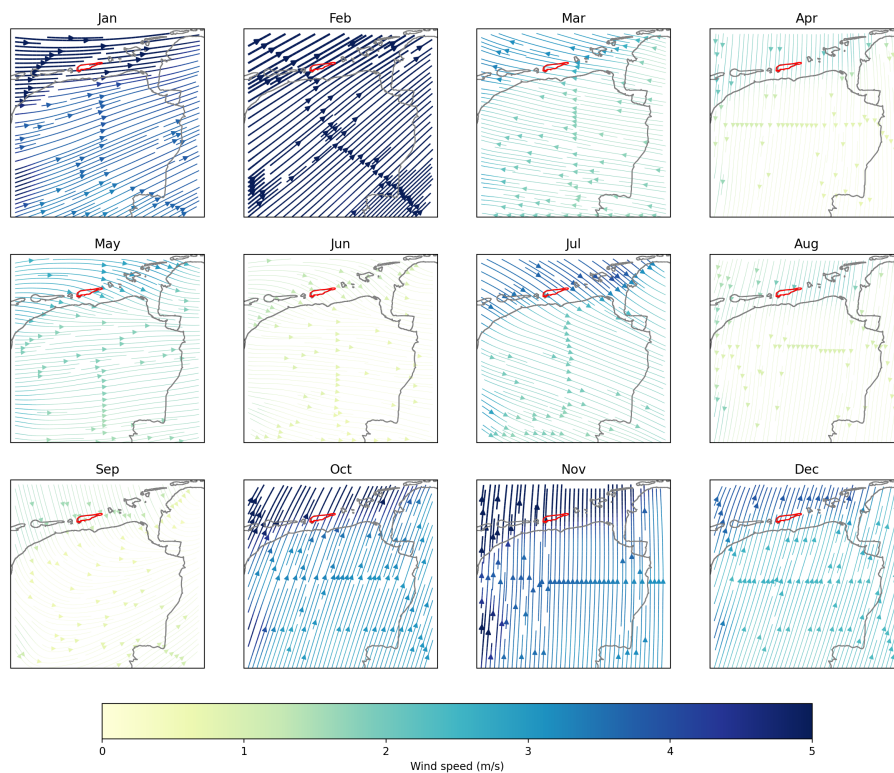

(b) 2022

**Figure S4.** Maps of wind field for 2019 (a) and 2022 (b).
